# Supplementary material for: Fire hazard modulation by long-term dynamics in land cover and dominant forest type in eastern and central Europe
Source: Copernicus journal article supplement (doi:10.5194/bg-17-1213-2020), 2020-03-04
Supplement: Supplementary file 2 [file bg-17-1213-2020-supplement.zip]

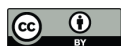

## *Supplement of*

# **Fire hazard modulation by long-term dynamics in land cover and dominant forest type in eastern and central Europe**

**Angelica Feurdean et al.**

*Correspondence to:* Angelica Feurdean ([angelica.feurdean@gmail.com](mailto:angelica.feurdean@gmail.com))

- [bg-17-1213-2020-supplement-title-page.pdf](#)
- [File\\_S1\\_Metadata\\_20200228.xls](#)
- [File\\_S2.pdf](#)

The copyright of individual parts of the supplement might differ from the CC BY 4.0 License.
